# Supplementary material
Source: ML conference proceedings conference paper supplement (https://proceedings.mlr.press/v108/wang20h.html)
Supplement: Supplementary file [file wang20h-supp.pdf]

## Supplementary Materials for “Finite-Time Error Bounds for Biased Stochastic Approximation with Applications to Q-learning” by G. Wang and G. B. Giannakis

**Remark.** The equations (1)–(39) and Assumptions 1–4 are referenced with respect to the indexing used in the paper.

### A Proof of Proposition 1

We start off the proof by introducing the following auxiliary function

$$g(k, T, \Theta_k) := \Theta_{k+T} - \Theta_k - \epsilon \sum_{j=k}^{k+T-1} f(\Theta_k, X_j), \quad \forall T \geq 1 \quad (40)$$

which is evidently well defined under our working Assumptions 1 and 3. Regarding the function  $g(k, T, \Theta_k)$  above, we present the following useful bound, whose proof details are, however, postponed to Appendix E for readability.

**Lemma 2.** For any  $\Theta_k \in \mathbb{R}^d$ , the function  $g(k, T, \Theta_k)$  satisfies for all  $k \geq 0$

$$\|g(k, T, \Theta_k)\| \leq \epsilon^2 L^2 T^2 (1 + \epsilon L)^{T-2}, \quad \forall T \geq 1. \quad (41)$$

On the other hand, note from (8) that

$$g'(k, T, \Theta_k) = \Theta_{k+T} - \Theta_k - \epsilon T \bar{f}(\Theta_k) \quad (42)$$

which, in conjunction with (40), suggests that we can write

$$\begin{aligned} g'(k, T, \Theta_k) &= g(k, T, \Theta_k) + \epsilon \sum_{j=k}^{k+T-1} f(\Theta_k, X_j) - \epsilon T \bar{f}(\Theta_k) \\ &= g(k, T, \Theta_k) + \epsilon \sum_{j=k}^{k+T-1} (f(\Theta_k, X_j) - \bar{f}(\Theta_k)). \end{aligned} \quad (43)$$

By taking expectation of both sides of (43) conditioned on the  $\sigma$ -field  $\mathcal{F}_k$ , along with the fact that  $\Theta_k$  is  $\mathcal{F}_k$ -measurable, we obtain

$$\begin{aligned} \mathbb{E}[g'(k, T, \Theta_k) | \mathcal{F}_k] &= \mathbb{E}[g(k, T, \Theta_k) | \mathcal{F}_k] + \epsilon \mathbb{E} \left[ \sum_{j=k}^{k+T-1} (f(\Theta_k, X_j) - \bar{f}(\Theta_k)) \mid \mathcal{F}_k \right] \\ &= \mathbb{E}[g(k, T, \Theta_k) | \mathcal{F}_k] + \epsilon T \left( \frac{1}{T} \sum_{j=k}^{k+T-1} \mathbb{E}[f(\Theta_k, X_j) | \mathcal{F}_k] - \bar{f}(\Theta_k) \right) \\ &\leq \epsilon L T \left[ \epsilon L T (1 + \epsilon L)^{T-2} + \sigma(T; k) \right] (\|\Theta_k\| + 1) \end{aligned} \quad (44)$$

where the last inequality follows from Lemma 2 as well as the property of the averaged operator  $\bar{f}$  in (7) under our working Assumption 3. This concludes the proof.

### B Proof of Theorem 1

We prove this theorem by carefully constructing function for  $W'(k, \Theta_k)$  from  $W(\Theta_k)$  (recall under our working assumption 2 that  $W(\Theta_k)$  exists and satisfies properties (52)–(6c)). Toward this objective, let us start with the following candidate

$$W'(k, \Theta_k) = \sum_{j=k}^{k+T-1} W(\Theta_j(k, \Theta_k)) \quad (45)$$

where, to make the dependence of  $\Theta_{j \geq k}$  on  $\Theta_k$  explicit, we maintain the notation  $\Theta_j = \Theta_j(k, \Theta_k)$ , which is understood as the state of the recursion (1) at time instant  $j \geq k$ , with an initial condition  $\Theta_k$  at time instant  $k$ .

In the following, we will show that there exists and also determine a value for the parameter  $T \in \mathbb{N}^+$  such that the inequalities (11) and (12) are satisfied.

For ease of exposition, we start by proving the second inequality (12). To this end, observe from the definition of  $W'(k, \Theta_k)$  in (45) that

$$\begin{aligned} W'(k+1, \Theta_k + \epsilon f(\Theta_k, X_k)) - W'(k, \Theta_k) &= \sum_{j=k+1}^{k+T} W(\Theta_j(k, \Theta_k)) - \sum_{j=k}^{k+T-1} W(\Theta_j(k, \Theta_k)) \\ &= W(\Theta_{k+T}(k, \Theta_k)) - W(\Theta_k(k, \Theta_k)) \\ &= W(\Theta_{k+T}(k, \Theta_k)) - W(\Theta_k) \end{aligned} \quad (46)$$

where the last equality is due to the fact that  $\Theta_k(k, \Theta_k) = \Theta_k$ .

To upper bound the term in (46), we will focus on bound the first term  $W(\Theta_{k+T}(k, \Theta_k))$ . Recall from (8) that

$$\Theta_{k+T}(k, \Theta_k) = \Theta_k + \epsilon T \bar{f}(\Theta_k) + g'(k, T, \Theta_k)$$

based on which we can find the second-order Taylor expansion of  $W(\Theta_{k+T}(k, \Theta_k))$  (which is twice differentiable under Assumption 2) around  $\Theta_k$ , as follows

$$\begin{aligned} W(\Theta_{k+T}(k, \Theta_k)) &= W(\Theta_k) + \left( \frac{\partial W}{\partial \theta} \Big|_{\Theta_k} \right)^\top [\epsilon T \bar{f}(\Theta_k) + g'(k, T, \Theta_k)] \\ &\quad + [\epsilon T \bar{f}(\Theta_k) + g'(k, T, \Theta_k)]^\top \nabla^2 W(\Theta'_k) [\epsilon T \bar{f}(\Theta_k) + g'(k, T, \Theta_k)] \end{aligned} \quad (47)$$

where we have employed the so-called mean-value theorem, suggesting that (47) holds with  $\Theta'_k := \Theta_k + \eta [\epsilon T \bar{f}(\Theta_k) + g'(k, T, \Theta_k)]$  for some constant  $\eta \in [0, 1]$ .

Next, we will pursue an upper bound for each individual term on the right hand side of (47) by conditioning on the  $\sigma$ -field  $\mathcal{F}_k$ . Again, using the fact that  $\Theta_k$  is  $\mathcal{F}_k$ -measurable and invoking (6b), we have that

$$\mathbb{E} \left[ \epsilon T \left( \frac{\partial W}{\partial \theta} \Big|_{\Theta_k} \right)^\top \bar{f}(\Theta_k) \Big| \mathcal{F}_k \right] \leq -c_3 \epsilon L T \|\Theta_k\|^2. \quad (48)$$

One can further verify the following bounds

$$\begin{aligned} \mathbb{E} \left[ \left( \frac{\partial W}{\partial \theta} \Big|_{\Theta_k} \right)^\top g'(k, T, \Theta_k) \Big| \mathcal{F}_k \right] &= \left( \frac{\partial W}{\partial \theta} \Big|_{\Theta_k} \right)^\top \mathbb{E}[g'(k, T, \Theta_k) \Big| \mathcal{F}_k] \\ &\leq \left\| \frac{\partial W}{\partial \theta} \Big|_{\Theta_k} \right\| \cdot \|\mathbb{E}[g'(k, T, \Theta_k) \Big| \mathcal{F}_k]\| \end{aligned} \quad (49)$$

$$\leq c_4 \|\Theta_k\| \cdot \epsilon L T \beta_k(T, \epsilon) (\|\Theta_k\| + 1) \quad (50)$$

$$\leq 2c_4 \epsilon L T \beta_k(T, \epsilon) (\|\Theta_k\|^2 + 1). \quad (51)$$

In particular, (49) uses the Cauchy-Schwartz inequality, (50) calls for Proposition 1, and the last one follows from the inequality  $\|\theta\|(\|\theta\| + 1) \leq 2(\|\theta\|^2 + 1)$ .

As far as the last term of (46) is concerned, it is clear that

$$\begin{aligned} &\mathbb{E} \left\{ [\epsilon T \bar{f}(\Theta_k) + g'(k, T, \Theta_k)]^\top \nabla^2 W(\Theta'_k) [\epsilon T \bar{f}(\Theta_k) + g'(k, T, \Theta_k)] \Big| \mathcal{F}_k \right\} \\ &\leq c_4 \mathbb{E} \left[ \|\epsilon T \bar{f}(\Theta_k) + g'(k, T, \Theta_k)\|^2 \Big| \mathcal{F}_k \right] \end{aligned} \quad (52)$$

$$\leq 2c_4 \epsilon^2 T^2 \|\bar{f}(\Theta_k)\|^2 + 2c_4 \mathbb{E} \left[ \|g'(k, T, \Theta_k)\|^2 \Big| \mathcal{F}_k \right] \quad (53)$$

$$\leq 2c_4\epsilon^2T^2L^2\|\Theta_k\|^2 + 2c_4\mathbb{E}\left[\|g'(k, T, \Theta_k)\|^2\middle|\mathcal{F}_k\right] \quad (54)$$

where (52) leverages the upper bound on the Hessian matrix of  $W(\theta)$  arising from the property (6c), (53) follows from the inequality  $\|a + b\|^2 \leq 2(\|a\|^2 + \|b\|^2)$  for any real-valued vectors  $a, b \in \mathbb{R}^d$ , and (54) uses the Lipschitz property of function  $\bar{f}(\theta)$  that can be easily verified since  $f(\theta, x)$  is Lipschitz in  $\theta$ .

To further upper bound the last term of (54), we establish the following helpful result whose proof is also postponed to Appendix F for readability.

**Lemma 3.** *The following bound holds for any fixed  $\theta_k \in \mathbb{R}^d$*

$$\mathbb{E}\left[\|g'(k, T, \theta_k)\|^2\middle|\mathcal{F}_k\right] \leq \epsilon^2L^2T^2\left[\epsilon^2L^2T^2(1 + \epsilon L)^{2T-4} + 12\right]\|\theta_k\|^2 + 8\epsilon^2L^2T^2. \quad (55)$$

Coming back to inequality (54), as  $\mathbb{E}[\Theta_k|\mathcal{F}_k] = \Theta_k$ , Lemma 3 now applies. Plugging (55) into (54), we establish an upper bound on the last term of (46) as follows

$$\begin{aligned} & \mathbb{E}\left\{\left[\epsilon T\bar{f}(\Theta_k) + g'(k, T, \Theta_k)\right]^\top \nabla^2 W(\Theta'_k) \left[\epsilon T\bar{f}(\Theta_k) + g'(k, T, \Theta_k)\right]\middle|\mathcal{F}_k\right\} \\ & \leq 2c_4\epsilon^2T^2L^2\left[\epsilon^2L^2T^2(1 + \epsilon L)^{2T-4} + 13\right]\|\Theta_k\|^2 + 16c_4\epsilon^2L^2T^2. \end{aligned} \quad (56)$$

Putting together the bounds in (48), (51), and (56), it follows from (47) that

$$\begin{aligned} & \mathbb{E}[W(\Theta_{k+T}(k, \Theta_k)) - W(\Theta_k)|\mathcal{F}_k] \\ & = \mathbb{E}\left[\epsilon T\left(\frac{\partial W}{\partial \theta}\bigg|_{\Theta_k}\right)^\top \bar{f}(\Theta_k) + \left(\frac{\partial W}{\partial \theta}\bigg|_{\Theta_k}\right)^\top g'(k, T, \Theta_k)\middle|\mathcal{F}_k\right] \\ & \quad + \mathbb{E}\left\{\left[\epsilon T\bar{f}(\Theta_k) + g'(k, T, \Theta_k)\right]^\top \nabla^2 W(\Theta'_k) \left[\epsilon T\bar{f}(\Theta_k) + g'(k, T, \Theta_k)\right]\middle|\mathcal{F}_k\right\} \\ & \leq -\epsilon LT\left\{c_3 - 2c_4\beta_k(T, \epsilon) - 2c_4\epsilon LT\left[\epsilon^2L^2T^2(1 + \epsilon L)^{2T-4} + 13\right]\right\}\|\Theta_k\|^2 \\ & \quad + 2c_4\epsilon LT\beta_k(T, \epsilon) + 16c_4\epsilon^2L^2T^2 \\ & = -\epsilon LT[c_3 - c_4\rho_k(T, \epsilon)]\|\Theta_k\|^2 + c_4\epsilon LT\kappa_k(T, \epsilon) \end{aligned} \quad (57)$$

where in the last equality, we have defined for notational brevity the following two functions

$$\rho_k(T, \epsilon) := 2\beta_k(T, \epsilon) + 2\epsilon LT\left[\epsilon^2L^2T^2(1 + \epsilon L)^{2T-4} + 13\right] \quad (58)$$

$$\kappa_k(T, \epsilon) := 2\beta_k(T, \epsilon) + 16\epsilon LT \quad (59)$$

both of which depend on parameters  $T \in \mathbb{N}^+$  and  $\epsilon > 0$ .

In the sequel, we will show that there exist parameters  $\epsilon > 0$  and  $T \geq 1$  such that the coefficient of (57) obeys  $c_3 - c_4\rho_k(T, \epsilon) > 0$  for all  $k \in \mathbb{N}^+$ . Formally, such a result is summarized in Proposition 2 below, whose proof is relegated to Appendix G.

**Proposition 2.** *Consider functions  $\beta_k(T, \epsilon)$  and  $\rho_k(T, \epsilon)$  defined in (10) and (58), respectively. Then for any  $\delta > 0$ , there exist constants  $\epsilon_\delta > 0$  and  $T_\delta \geq 1$ , such that the following inequality holds for each  $\epsilon \in (0, \epsilon_\delta)$*

$$\sigma(T_\delta, k) < \rho_k(T_\delta, \epsilon) < \rho_0(T_\delta, \epsilon) < \rho_0(T_\delta, \epsilon_\delta) \leq \delta, \quad \forall k \geq 1. \quad (60)$$

As such, by taking any  $\delta < c_3/c_4$ , feasible parameter values  $T^*$  and  $\epsilon_c$  can be obtained according to (114) and (116), respectively. Now by choosing

$$T^* = T_\delta \quad (61)$$

$$\epsilon_c = \epsilon_\delta \quad (62)$$

it follows that

$$c'_3 := LT^*[c_3 - c_4\rho_0(T^*, \epsilon_\delta)] = LT^*(c_3 - c_4\delta) > 0. \quad (63)$$

It follows from (57) that

$$\begin{aligned}\mathbb{E}[W(\Theta_{k+T}(k, \Theta_k)) - W(\Theta_k) | \mathcal{F}_k] &\leq -c'_3 \epsilon \|\Theta_k\|^2 + c_4 \epsilon L T^* \kappa_k(T^*, \epsilon) \\ &= -c'_3 \epsilon \|\Theta_k\|^2 + c'_4 \epsilon^2 + c'_5 \sigma(T^*; k) \epsilon\end{aligned}\quad (64)$$

where we have defined constants  $c'_4 := c_4 L T^* [2L(1 + \epsilon_\delta L)^{T^* - 2} + 16L T^*]$ , and  $c'_5 := 2c_4 L T^*$ .

Finally, recalling (46), we deduce that

$$\mathbb{E}[W'(k+1, \Theta_k + \epsilon f(\Theta_k, X_k)) - W'(k, \Theta_k) | \mathcal{F}_k] \leq -c'_3 \epsilon \|\Theta_k\|^2 + c'_4 \epsilon^2 + c'_5 \sigma(T^*; k) \epsilon \quad (65)$$

concluding the proof of (12).

Now, we turn to show the first inequality. It is evident from the properties of  $W(\Theta_k)$  in Assumption 2 that

$$\begin{aligned}W'(k, \Theta_k) &= \sum_{j=k}^{k+T-1} W(\Theta_j(k, \Theta_k)) \geq W(\Theta_k(k, \Theta_k)) \\ &\geq c_1 \|\Theta_k(k, \Theta_k)\|^2 \\ &= c_1 \|\Theta_k\|^2\end{aligned}\quad (66)$$

where the second inequality follows from (6a), and the last equality from the fact that  $\Theta_k(k, \Theta_k) = \Theta_k$ . Therefore, by taking  $c'_1 = c_1$ , we have shown that the first part of inequality (11) holds true. For the second part, it follows that

$$\|\Theta_{j+1}\| = \|\Theta_j + \epsilon f(\Theta_j, X_j)\| \leq (1 + \epsilon L) \|\Theta_j\| + \epsilon L, \quad \forall j \geq k \quad (67)$$

yielding by means of telescoping series

$$\begin{aligned}\|\Theta_j(k, \Theta_k)\| &\leq (1 + \epsilon L)^{j-k} \|\Theta_k\| + \sum_{j=1}^{j-k} (1 + \epsilon L)^{j-1} \epsilon L \\ &\leq (1 + \epsilon L)^{j-k} \|\Theta_k\| + (1 + \epsilon L)^{j-k} - 1, \quad \forall j \geq k.\end{aligned}$$

Using further the inequality  $(a + b)^2 \leq 2(a^2 + b^2)$ , we deduce that

$$\|\Theta_j(k, \Theta_k)\|^2 \leq 2(1 + \epsilon L)^{2(j-k)} \|\Theta_k\|^2 + 2 \left[ (1 + \epsilon L)^{j-k} - 1 \right]^2. \quad (68)$$

Taking advantage of the properties of  $W(\Theta_k)$  in Assumption 2 and (68), it follows that

$$\begin{aligned}W'(k, \Theta_k) &= \sum_{j=k}^{k+T-1} W(\Theta_j(k, \Theta_k)) \\ &\leq \sum_{j=k}^{k+T-1} c_2 \|\Theta_j(k, \Theta_k)\|^2 \\ &\leq 2c_2 \sum_{j=k}^{k+T-1} (1 + \epsilon L)^{2(j-k)} \|\Theta_k\|^2 + 2c_2 \sum_{j=k}^{k+T-1} \left[ (1 + \epsilon L)^{j-k} - 1 \right]^2.\end{aligned}\quad (69)$$

Let us now examine the two coefficients of (69) more carefully. Note that

$$\sum_{j=k}^{k+T-1} (1 + \epsilon L)^{2(j-k)} = \frac{(1 + \epsilon L)^{2T} - 1}{(1 + \epsilon L)^2 - 1} = T \frac{2 + (2T - 1)(1 + \epsilon' L)^{2T-2} \epsilon L}{2 + \epsilon L} \quad (70)$$

$$\sum_{j=k}^{k+T-1} \left[ (1 + \epsilon L)^{j-k} - 1 \right]^2 = \sum_{j=k+1}^{k+T-1} \left[ (j - k) \epsilon L \left( 1 + \frac{1}{2} (j - k - 1) (1 + \epsilon'_{j-k} L)^{j-k-2} \epsilon L \right) \right]^2 \quad (71)$$

$$= (\epsilon L)^2 \sum_{j=1}^{T-1} j^2 \left[ 1 + \frac{1}{2}(j-1)(1 + \epsilon'_j L)^{j-2} \right]^2 \quad (72)$$

where both (70) and (71) follow from the mean-value theorem  $(1 + \epsilon L)^{j-k} = 1 + (j-k)\epsilon L + \frac{1}{2}(j-k-1)(1 + \epsilon'_{j-k} L)^{j-k-2}(\epsilon L)^2$  for any  $j-k \geq 1$  and some constants  $\epsilon'_j \in [0, \epsilon]$ .

According to Proposition 2, or more specifically, the inequalities (61) and (62), we see that  $\epsilon'_j \leq \epsilon \leq \epsilon_\delta$  for all  $1 \leq j \leq T-1$ .

On the other hand, it is easy to check that both terms [(70) and (72)] are monotonically increasing functions of  $\epsilon > 0$ . Therefore, if we define constants

$$c'_2 := 2c_2 T^* \frac{2 + (2T^* - 1)(1 + \epsilon_\delta L)^{2T^* - 2} \epsilon_\delta L}{2 + \epsilon_\delta L} \quad (73)$$

$$c''_2 := 2c_2 \sum_{j=1}^{T^*-1} j^2 \left[ 1 + \frac{1}{2}(j-1)(1 + \epsilon_\delta L)^{j-2} \right]^2 \quad (74)$$

which are independent of  $\epsilon$ , then we draw from (69), (70), and (72) that

$$W'(k, \Theta_k) \leq c'_2 \|\Theta_k\|^2 + c''_2 (\epsilon L)^2. \quad (75)$$

concluding the proof of the second part of (11).

## C Proof of Lemma 1

Taking expectation of both sides of (11) conditioned on  $\mathcal{F}_k$  gives rise to

$$\mathbb{E}[W'(k, \Theta_k) | \mathcal{F}_k] \leq c'_2 \|\Theta_k\|^2 + c''_2 (\epsilon L)^2. \quad (76)$$

On the other hand, it is evident from (12) that

$$\begin{aligned} & \mathbb{E}[W'(k+1, \Theta_{k+1}) | \mathcal{F}_k] \\ & \leq \mathbb{E}[W'(k, \Theta_k) | \mathcal{F}_k] - c'_3 \epsilon \|\Theta_k\|^2 + c'_4 \epsilon^2 + c'_5 \sigma(T^*; k) \epsilon \\ & = \mathbb{E}[W'(k, \Theta_k) | \mathcal{F}_k] - \frac{c'_3 \epsilon}{c'_2} [c'_2 \|\Theta_k\|^2 + c''_2 (\epsilon L)^2] + \frac{c'_3}{c'_2} c'_2 \epsilon (\epsilon L)^2 + c'_4 \epsilon^2 + c'_5 \sigma(T^*; k) \epsilon \\ & \leq \mathbb{E}[W'(k, \Theta_k) | \mathcal{F}_k] - \frac{c'_3 \epsilon}{c'_2} \mathbb{E}[W'(k, \Theta_k) | \mathcal{F}_k] + \frac{c'_3}{c'_2} c'_2 \epsilon_\delta (\epsilon L)^2 + c'_4 \epsilon^2 + c'_5 \sigma(T^*; k) \epsilon \end{aligned} \quad (77)$$

$$= \left( 1 - \frac{c'_3 \epsilon}{c'_2} \right) \mathbb{E}[W'(k, \Theta_k) | \mathcal{F}_k] + c'_4 \epsilon^2 + c'_5 \sigma(T^*; k) \epsilon \quad (78)$$

where, in order to obtain (77), we have employed the inequality in (76), and used the fact that  $\epsilon < \epsilon_\delta$  to derive (78); and the last equality follows from  $c'_4 := c'_4 + c'_3 c'_2 \epsilon_\delta L^2 / c'_2$ .

Finally, taking expectation of both sides of (78) with respect to the  $\sigma$ -field  $\mathcal{F}_k$ , concludes the proof.

## D Proof of Theorem 2

Let us start with a basic Lemma, whose proof is elementary and is hence omitted here.

**Lemma 4.** *Consider the recursion  $z_{t+1} = az_t + b$ , where  $a \neq 1$  and  $b$  are given constants. Then the following holds for all  $t \geq t_0 \geq 0$*

$$z_t = a^{t-t_0} z_{t_0} + \frac{b(a^{t-t_0} - 1)}{a - 1}. \quad (79)$$

Proof of Theorem 2 is established in two phases depending on the  $k$  values. Specifically, let us define  $k_\epsilon := \min\{k \in \mathbb{N}^+ | \sigma(T^*; k) \leq \epsilon\}$ ; then the first phase is from  $k = 0$  to  $k_\epsilon$ , while the second phase consists of all  $k > k_\epsilon$ .

*Phase I* ( $k \leq k_\epsilon$ ). We have from 2 that  $\sigma(T^*; k) \leq \delta$  for all  $0 \leq k \leq k_\epsilon$ . Then, fixing  $t_0 = 0$ , and substituting  $a := 1 - c'_3\epsilon/c'_2 > 0$  and  $b := c'_4\epsilon^2 + c'_5\delta\epsilon$  in (79), the recursion  $\{\mathbb{E}[W'(k, \Theta_k)]\}$  in (14) can be recursively expressed as follows

$$\begin{aligned} \mathbb{E}[W'(k, \Theta_k)] &\leq \left(1 - \frac{c'_3\epsilon}{c'_2}\right) \mathbb{E}[W'(k-1, \Theta_{k-1})] + c'_4\epsilon^2 + c'_5\delta\epsilon \\ &\leq \left(1 - \frac{c'_3\epsilon}{c'_2}\right)^k \mathbb{E}[W'(0, \Theta_0)] + \left[1 - \left(1 - \frac{c'_3\epsilon}{c'_2}\right)^k\right] \frac{c'_2}{c'_3} (c'_4\epsilon + c'_5\delta) \end{aligned} \quad (80)$$

$$\begin{aligned} &\leq \left(1 - \frac{c'_3\epsilon}{c'_2}\right)^k \mathbb{E}[W'(0, \Theta_0)] + \frac{c'_2}{c'_3} (c'_4\epsilon + c'_5\delta) \\ &\leq \left(1 - \frac{c'_3\epsilon}{c'_2}\right)^k \mathbb{E}[W'(0, \Theta_0)] + \frac{c'_2}{c'_3} (c'_4 + c'_5)\delta \end{aligned} \quad (81)$$

$$\leq c'_2 \left(1 - \frac{c'_3\epsilon}{c'_2}\right)^k \|\Theta_0\|^2 + c'_2 L^2 \epsilon^2 + c_6\delta \quad (82)$$

where the last inequality follows from  $\epsilon \leq \delta$  and the fact [cf. (11)] that

$$\mathbb{E}[W'(0, \Theta_0)] \leq c'_2 \mathbb{E}[\|\Theta_0\|^2] + c'_2 \epsilon^2 L^2 \leq c'_2 \|\Theta_0\|^2 + c'_2 \epsilon^2 L^2 \quad (83)$$

where the initial guess  $\Theta_0 \in \mathbb{R}^d$  is assumed given for simplicity; and  $c_6 := c_2(c'_4 + c'_5)/c'_3$ .

On the other hand, using (11), the term  $\mathbb{E}[W'(k, \Theta_k)]$  can be lower bounded as follows

$$\mathbb{E}[W'(k, \Theta_k)] \geq c'_1 \|\Theta_k\|^2 \quad (84)$$

which, combined with (82), yields the finite-time error bound for iterations  $k \leq k_\epsilon$

$$\mathbb{E}[\|\Theta_k\|^2] \leq \frac{c'_2}{c'_1} \left(1 - \frac{c'_3\epsilon}{c'_2}\right)^k \|\Theta_0\|^2 + \frac{c'_2 L^2}{c'_1} \epsilon^2 + \frac{c_6}{c'_1} \delta. \quad (85)$$

*Phase II* ( $k > k_\epsilon$ ). Using now the fact that  $\sigma(T^*; k) \leq \epsilon$  due to the definition of  $k_\epsilon$ , the recursion  $\{\mathbb{E}[W'(k, \Theta_k)]\}$  for all  $k > k_\epsilon$  becomes

$$\mathbb{E}[W'(k+1, \Theta_{k+1})] \leq \left(1 - \frac{c'_3\epsilon}{c'_2}\right) \mathbb{E}[W'(k, \Theta_k)] + c'_4\epsilon^2 + c'_5\sigma(T^*; k)\epsilon \quad (86)$$

$$\leq \left(1 - \frac{c'_3\epsilon}{c'_2}\right) \mathbb{E}[W'(k, \Theta_k)] + (c'_4 + c'_5)\epsilon^2. \quad (87)$$

Letting  $t_0 = k_\epsilon$ , and replacing  $a$  and  $b$  in (79) by constants  $(1 - c'_3\epsilon/c'_2)$  and  $(c'_4 + c'_5)\epsilon^2$  accordingly, we arrive at

$$\begin{aligned} \mathbb{E}[W'(k, \Theta_k)] &\leq \left(1 - \frac{c'_3\epsilon}{c'_2}\right)^{k-k_\epsilon} \mathbb{E}[W'(k_\epsilon, \Theta_{k_\epsilon})] + \left[1 - \left(1 - \frac{c'_3\epsilon}{c'_2}\right)^{k-k_\epsilon}\right] \frac{c'_2}{c'_3} (c'_4 + c'_5)\epsilon \\ &\leq \left(1 - \frac{c'_3\epsilon}{c'_2}\right)^{k-k_\epsilon} \left[ \left(1 - \frac{c'_3\epsilon}{c'_2}\right)^{k_\epsilon} \mathbb{E}[W'(0, \Theta_0)] + \frac{c'_2}{c'_3} (c'_4\epsilon + c'_5\delta) \right] + \frac{c'_2(c'_4 + c'_5)}{c'_3} \epsilon \\ &\leq \left(1 - \frac{c'_3\epsilon}{c'_2}\right)^k \mathbb{E}[W'(0, \Theta_0)] + \left(1 - \frac{c'_3\epsilon}{c'_2}\right)^{k-k_\epsilon} \frac{c'_2(c'_4 + c'_5)}{c'_3} \delta + \frac{c'_2(c'_4 + c'_5)}{c'_3} \epsilon \end{aligned} \quad (88)$$

$$\leq c'_2 \left(1 - \frac{c'_3\epsilon}{c'_2}\right)^k \|\Theta_0\|^2 + c'_2 \epsilon^2 L^2 + \left(1 - \frac{c'_3\epsilon}{c'_2}\right)^{k-k_\epsilon} c_6\delta + c_6\epsilon \quad (89)$$

where we have used the following bound at  $k = k_\epsilon$  from Phase I in (80) along with (83)

$$\mathbb{E}[W'(k_\epsilon, \Theta_{k_\epsilon})] \leq \left(1 - \frac{c'_3\epsilon}{c'_2}\right)^{k_\epsilon} \mathbb{E}[W'(0, \Theta_0)] + \left[1 - \left(1 - \frac{c'_3\epsilon}{c'_2}\right)^{k_\epsilon}\right] \frac{c'_2}{c'_3} (c'_4\epsilon + c'_5\delta). \quad (90)$$

Plugging (84) into (89), yields the finite-time error bound for  $k \geq k_\epsilon$

$$\mathbb{E}[\|\Theta_k\|^2] \leq \frac{c'_2}{c'_1} \left(1 - \frac{c'_3\epsilon}{c'_2}\right)^k \|\Theta_0\|^2 + \frac{c''_2 L^2}{c'_1} \epsilon^2 + \left(1 - \frac{c'_3\epsilon}{c'_2}\right)^{k-k_\epsilon} \frac{c_6}{c'_1} \delta + \frac{c_6}{c'_1} \epsilon \quad (91)$$

which converges to a small (size- $\epsilon$ ) neighborhood of the optimal solution  $\Theta^* = 0$  at a linear rate.

Combining the results in the two phases, we deduce the following error bound that holds at any  $k \in \mathbb{N}^+$

$$\mathbb{E}[\|\Theta_k\|^2] \leq \frac{c'_2}{c'_1} \left(1 - \frac{c'_3\epsilon}{c'_2}\right)^k \|\Theta_0\|^2 + \frac{c''_2 L^2}{c'_1} \epsilon^2 + \left(1 - \frac{c'_3\epsilon}{c'_2}\right)^{\max\{k-k_\epsilon, 0\}} \frac{c_6}{c'_1} \delta + \frac{c_6}{c'_1} \epsilon \quad (92)$$

concluding the proof of Theorem 2.

## E Proof of Lemma 2

When  $T = 1$  and for any  $\Theta_k \in \mathbb{R}^d$ , one can easily check that

$$g(k, 1, \Theta_k) = \Theta_{k+1} - \Theta_k - \epsilon f(\Theta_k, X_k) = 0$$

implying  $G_1 := \|g(k, 1, \Theta_k)\| = 0$ . To proceed, let us start by introducing the function

$$h(k, T, \Theta_k) := \sum_{j=k}^{k+T-1} f(\Theta_k, X_j)$$

which can be bounded as follows

$$\begin{aligned} \|h(k, T, \Theta_k)\| &= \left\| \sum_{j=k}^{k+T-1} f(\Theta_k, X_j) \right\| \leq \sum_{j=k}^{k+T-1} \|f(\Theta_k, X_j)\| \\ &\leq L \sum_{j=k}^{k+T-1} (\|\Theta_k\| + 1) \\ &= TL(\|\Theta_k\| + 1) \end{aligned} \quad (93)$$

where the second inequality follows from (5) in Assumption 1.

It is evident that

$$\begin{aligned} g(k, T+1, \Theta_k) &= \Theta_{k+T+1} - \Theta_k - \epsilon \sum_{j=k}^{k+T} f(\Theta_k, X_j) \\ &= \Theta_{k+T} + \epsilon f(\Theta_{k+T}, X_{k+T}) - \Theta_k - \epsilon \left[ f(\Theta_k, X_{k+T_0}) + \sum_{j=k}^{k+T-1} f(\Theta_k, X_j) \right] \\ &= g(k, T, \Theta_k) + \epsilon [f(\Theta_{k+T}, X_{k+T}) - f(\Theta_k, X_{k+T})]. \end{aligned} \quad (94)$$

By means of triangle inequality, it follows that

$$G_{T+1} = \|g(k, T+1, \Theta_k)\| \leq \|g(k, T, \Theta_k)\| + \epsilon \|f(\Theta_{k+T}, X_{k+T}) - f(\Theta_k, X_{k+T})\| \quad (95)$$

$$\leq G_T + \epsilon L \|\Theta_{k+T} - \Theta_k\| \quad (96)$$

$$\leq G_T + \epsilon L [\epsilon \|h(k, T, \Theta_k)\| + \|g(k, T, \Theta_k)\|] \quad (97)$$

$$\leq (1 + \epsilon L) G_T + \epsilon^2 L^2 T (\|\Theta_k\| + 1) \quad (97)$$

$$\leq \epsilon^2 L^2 (\|\Theta_k\| + 1) \sum_{k=0}^T (1 + \epsilon L)^{T-k} k \quad (98)$$

where the inequality (95) follows from the Lipschitz continuity of  $f(\theta, x)$  in  $\theta$ , (96) from the fact that  $\Theta_{k+T} = \Theta_k + \epsilon h(k, T, \Theta_k) + g(k, T, \Theta_k)$ , (97) from (93) as well as the definition  $G_T := \|g(k, T, \Theta_k)\|$ , and the last inequality is obtained by telescoping series and uses  $G_1 = 0$ .

**Lemma 5.** *Given any positive constant  $d \neq 1$ , the following holds for all  $T \geq 1$*

$$S_{T+1} = \sum_{k=0}^T kd^k = \frac{d(1-d^T)}{(1-d)^2} - \frac{Td^{T+1}}{1-d}. \quad (99)$$

Taking  $d = (1 + \epsilon L)^{-1}$  in (99), then (98) can be simplified as follows

$$\begin{aligned} G_T &\leq \epsilon^2 L^2 (1 + \epsilon L)^{T-1} (\|\Theta_k\| + 1) \sum_{k=0}^{T-1} (1 + \epsilon L)^{-k} k \\ &= [(1 + \epsilon L)^T - \epsilon L T - 1] (\|\Theta_k\| + 1). \end{aligned} \quad (100)$$

To further simplify this bound, the Taylor expansion along with the mean-value theorem confirms that the following holds for some  $\epsilon' \in (0, 1)$

$$(1 + \epsilon L)^T = 1 + \epsilon L T + \frac{1}{2} T(T-1) (1 + \epsilon' L)^{T-2} (\epsilon L)^2, \quad \forall T \geq 1 \quad (101)$$

or equivalently,

$$(1 + \epsilon L)^T - 1 - \epsilon L T = \frac{1}{2} T(T-1) (1 + \epsilon' L)^{T-2} (\epsilon L)^2 \quad (102)$$

$$\leq \epsilon^2 L^2 T^2 (1 + \epsilon L)^{T-2}. \quad (103)$$

## F Proof of Lemma 3

Recalling that  $g'(k, T, \Theta_k) = g(k, T, \Theta_k) + \epsilon \sum_{j=k}^{k+T-1} [f(\Theta_k, X_j) - \bar{f}(\Theta_k)]$ , we have

$$\begin{aligned} \|g'(k, T, \Theta_k)\|^2 &= \left\| g(k, T, \Theta_k) + \epsilon \sum_{j=k}^{k+T-1} (f(\Theta_k, X_j) - \bar{f}(\Theta_k)) \right\|^2 \\ &\leq 2 \|g(k, T, \Theta_k)\|^2 + 2\epsilon^2 T^2 \left\| \frac{1}{T} \sum_{j=k}^{k+T-1} f(\Theta_k, X_j) - \bar{f}(\Theta_k) \right\|^2 \end{aligned} \quad (104)$$

$$\begin{aligned} &\leq 4 [(1 + \epsilon L)^T - \epsilon L T - 1]^2 (\|\Theta_k\|^2 + 1) \\ &\quad + 4\epsilon^2 T^2 \left\| \frac{1}{T} \sum_{j=k}^{k+T-1} f(\Theta_k, X_j) \right\|^2 + 4\epsilon^2 T^2 \|\bar{f}(\Theta_k)\|^2 \end{aligned} \quad (105)$$

where we have used the property  $\|a + b\|^2 \leq 2(\|a\|^2 + \|b\|^2)$  for any real-valued vectors  $a, b$  in deriving (104) and (105), as well as Proposition 1.

Squaring both sides of (102) yields

$$[(1 + \epsilon L)^T - 1 - \epsilon L T]^2 = \frac{1}{4} T^2 (T-1)^2 (\epsilon L)^4 (1 + \epsilon' L)^{2T-4} \leq \frac{1}{4} \epsilon^4 L^4 T^4 (1 + \epsilon L)^{2T-4}. \quad (106)$$

Thus, the first term of (105) can be upper bounded by

$$4 [(1 + \epsilon L)^T - \epsilon L T - 1]^2 (\|\Theta_k\|^2 + 1) \leq \epsilon^4 L^4 T^4 (1 + \epsilon L)^{2T-4} (\|\Theta_k\|^2 + 1). \quad (107)$$

Regarding the second term of (105), we have that

$$\left\| \frac{1}{T} \sum_{j=k}^{k+T-1} f(\Theta_k, X_j) \right\|^2 \leq \frac{1}{T} \sum_{j=k}^{k+T-1} \|f(\Theta_k, X_j)\|^2 \quad (108)$$

$$\leq \frac{1}{T} \sum_{j=k}^{k+T-1} L^2 (\|\Theta_k\| + 1)^2 \quad (109)$$

$$\leq 2L^2 \|\Theta_k\|^2 + 2L^2 \quad (110)$$

where (108) and (110) follow from the inequality  $\|\sum_{i=1}^n z_i\|^2 \leq n \sum_{i=1}^n \|z_i\|^2$  for all real-valued vectors  $\{z_i\}_{i=1}^n$ , and (109) from our working assumption on function  $f(\theta, x)$ .

With regards to the last term of (105), it follows directly from the Lipschitz property of the average operator  $\bar{f}(\theta)$  that

$$\|\bar{f}(\Theta_k)\|^2 \leq L^2 \|\Theta_k\|^2. \quad (111)$$

Substituting the bounds in (107), (110), and (111) into (105), we arrive at

$$\|g'(k, T, \Theta_k)\|^2 \leq \epsilon^2 L^2 T^2 \left[ \epsilon^2 L^2 T^2 (1 + \epsilon L)^{2T-4} + 12 \right] \|\Theta_k\|^2 + 8\epsilon^2 L^2 T^2 \quad (112)$$

concluding the proof.

## G Proof of Proposition 2

We prove this claim by construction. By definition, it follows that for all  $k \in \mathbb{N}^+$

$$\rho_k(T, \epsilon) \leq \rho_0(T, \epsilon) = 2\epsilon L T \left[ (1 + \epsilon L)^{T-2} + 13 \right] + 2(\epsilon L T)^3 (1 + \epsilon L)^{2T-4} + 2\sigma(T; 0). \quad (113)$$

Under the assumption that  $\lim_{T \rightarrow +\infty} \sigma(T; 0) = 0$ , the function value  $\sigma(T; 0) \geq 0$  can be made arbitrarily small by taking a sufficiently large integer  $T \in \mathbb{N}^+$  in constructing the function  $W'(k, \Theta_k)$ . Without loss of generality, let us work with  $T$  such that

$$T_\delta := \min \left\{ T \in \mathbb{N}^+ \mid \sigma(T; 0) \leq \frac{\delta}{4} \right\}. \quad (114)$$

It is clear that  $T_\delta \geq 1$ . Define function

$$\nu(\epsilon) := \epsilon L T_\delta \left[ (1 + \epsilon L)^{T_\delta-2} + 13 \right] + (\epsilon L T_\delta)^3 (1 + \epsilon L)^{2T_\delta-4} \quad (115)$$

which can be easily shown to be a monotonically decreasing function of  $\epsilon > 0$ , and which attains its minimum  $\nu = 0$  at  $\epsilon = 0$ . Let  $\epsilon_\delta$  be the unique solution to the equation

$$\nu(\epsilon) = \frac{\delta}{4}, \quad \epsilon > 0. \quad (116)$$

As a result, for all  $\epsilon \in (0, \epsilon_\delta]$ , it holds that

$$\nu(\epsilon) \leq \frac{\delta}{4}. \quad (117)$$

Combining (114) and (117) concludes the proof of Proposition 2.
